# Supplementary material for: Design and construction of polyaromatic group containing Cd(ii)-based coordination polymers for solvent-free Strecker-type cyanation of acetals
Source: Royal Society of Chemistry journal article supplement (doi:10.1039/d2nj00168c), 2022-01-01
Supplement: d2nj00168c1.pdf [file d2nj00168c1.pdf]

## Supporting Information

### Designing and Construction of Polyaromatic Group Containing Cd(II)-based Coordination Polymers for Solvent-free Strecker-type Cyanation of Acetals

Anirban Karmakar<sup>a,\*</sup>, Anup Paul<sup>a</sup>, Pedro M. R. Santos<sup>a</sup>, Inês R. M. Santos<sup>a</sup>, M. Fátima C. Guedes da Silva<sup>a</sup>, Armando J. L. Pombeiro<sup>a,b,\*</sup>

<sup>a</sup>Centro de Química Estrutural, Instituto Superior Técnico, Universidade de Lisboa, Av. Rovisco Pais, 1049-001, Lisbon, Portugal.

<sup>b</sup>Peoples' Friendship University of Russia (RUDN University), 6 Miklukho-Maklaya Street, Moscow, 117198, Russian Federation. E-mail: [anirbanchem@gmail.com](mailto:anirbanchem@gmail.com); [pombeiro@tecnico.ulisboa.pt](mailto:pombeiro@tecnico.ulisboa.pt).

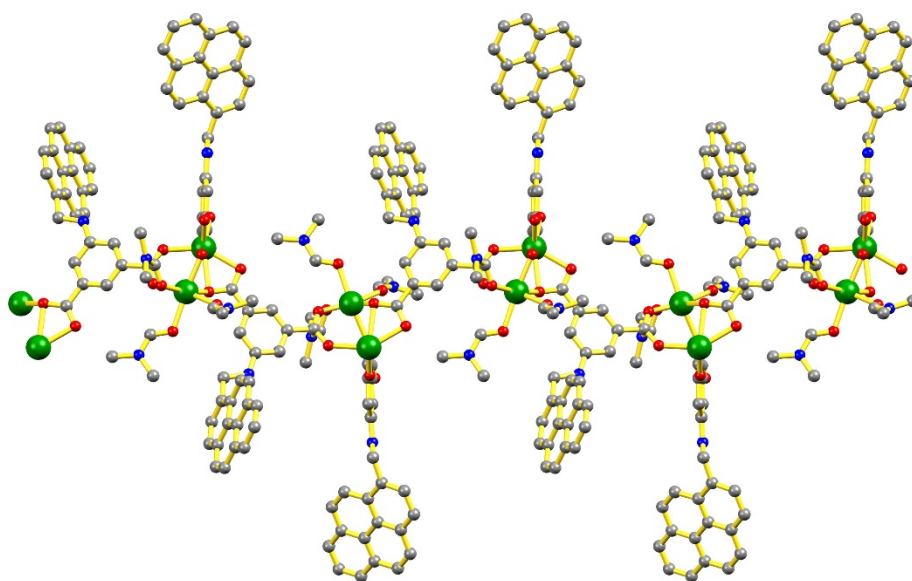

Figure S1 View of framework **2** from *a*-axis.

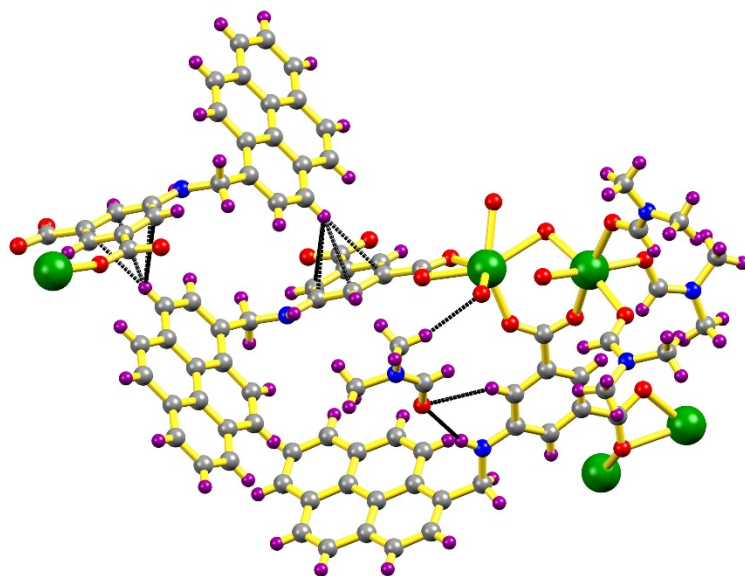

Figure S2 C-H $\cdots\pi$ , C-H $\cdots$ O and N-H $\cdots$ O interactions present in the CP 2.

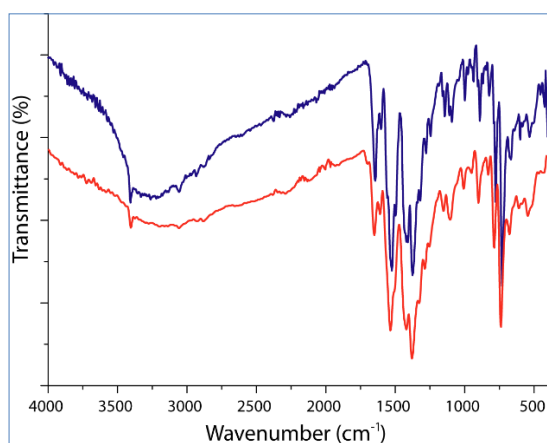

A

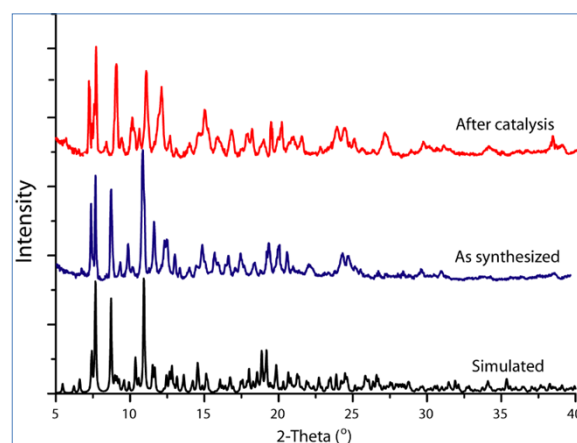

B

Figure S3 (A) FT-IR spectra of CP 1 before (in blue) and after the cyanation reaction (in red). (B) Powder XRD diffractograms of CP 1 simulated (in black), as synthesized (in blue) and after the cyanation reactions (in red).

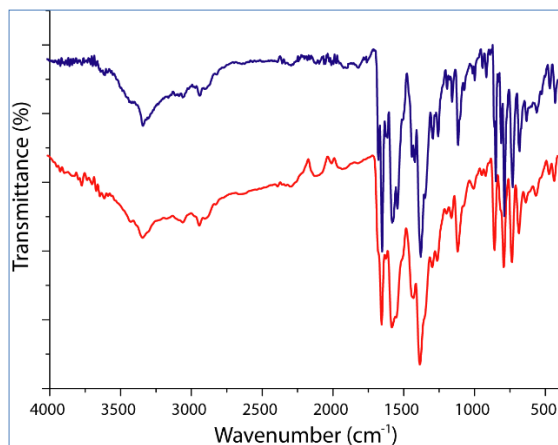

A

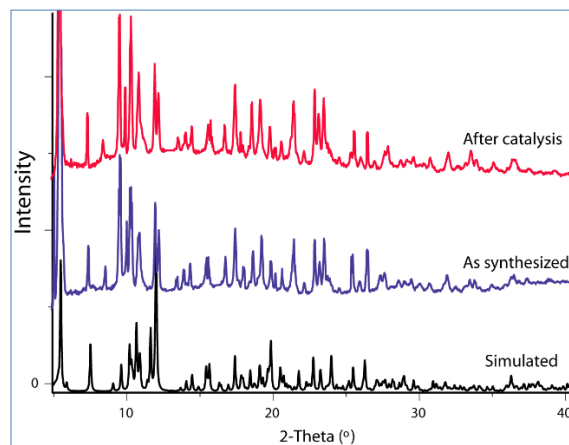

B

Figure S4 (A) FT-IR spectra of CP **2** before (in blue) and after the cyanation reaction (in red). (B) Powder XRD diffractograms of CP **2** simulated (in black), as synthesized (in blue) and after the cyanation reactions (in red).

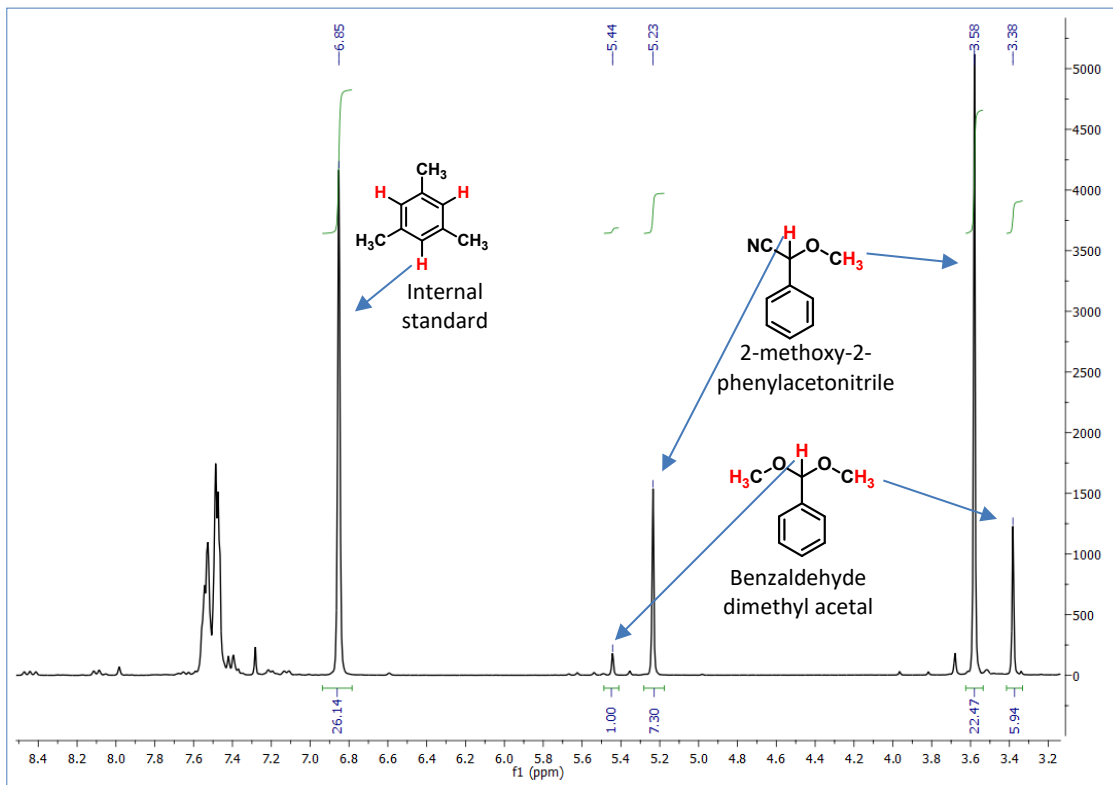

A

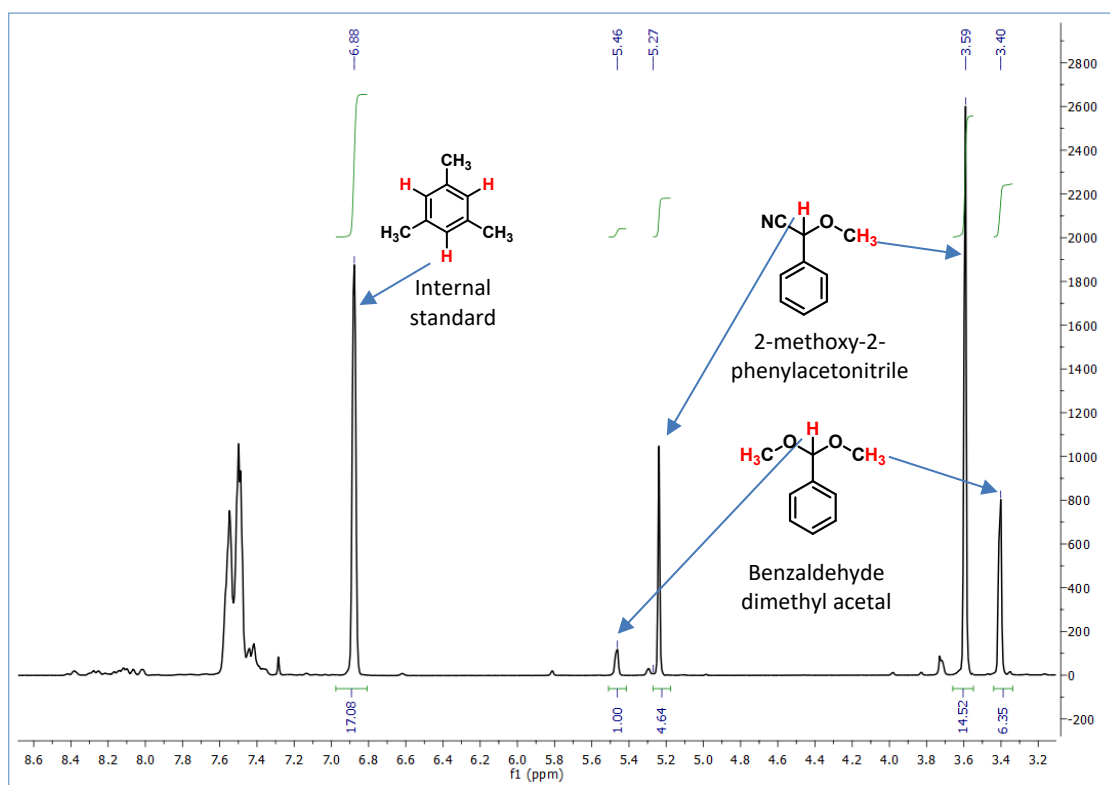

B

Figure S5 Example of integration in the  $^1\text{H}$ -NMR spectrum for the determination of the product yield in the cyanation of acetals catalysed by CP 1 (A) and CP 2 (B) under solvent free condition [Table 1, entries 1 and 2].

#### Reaction yield calculation details from NMR:

In order to calculate the % of yield from H NMR spectroscopy, at first, the molar amount of product (P) was calculated from the molar amount of internal standard (IS) and the molar ratio, where the following formula has been utilized to carry out all the calculations.

The molar ratio of the compound,  $r_{P/IS} = (\text{integral}_{P/NA})/(\text{integral}_{IS/NIS})$  where N = number of nuclei present for the corresponding peaks.

The molar amount of product (P),  $n_P = n_{IS} \times r_{P/IS}$

The NMR yield (in %) =  $(n_P \times 100)/(\text{theoretical yield of analyte})$

**For CP 1:**  $r_{P/IS} = (7.30/1)/(26.14/3) = 0.84$

The molar amount of internal standard (IS),  $n_{IS} : 1.15 \text{ mmol}$

The molar amount of product (P),  $n_P = n_{IS} \times r_{P/IS} = 1.15 \times 0.84 = 0.966 \text{ mmol}$

The NMR yield (in %) =  $(n_P \times 100)/(\text{theoretical yield of analyte}) = (0.966 \times 100)/1.0 = 96.6 \%$

**For CP 2:**  $r_{P/IS} = (4.64/1)/(17.08/3) = 0.82$

The molar amount of internal standard (IS),  $n_{IS}$  : 1.15 mmol

The molar amount of product (P),  $n_P$  =  $n_{IS} \times r_{P/IS}$  = 1.15 X 0.82 = 0.943 mmol

The NMR yield (in %) =  $(n_P \times 100) / (\text{theoretical yield of analyte}) = (0.943 \times 100) / 1.0 = 94.3 \%$

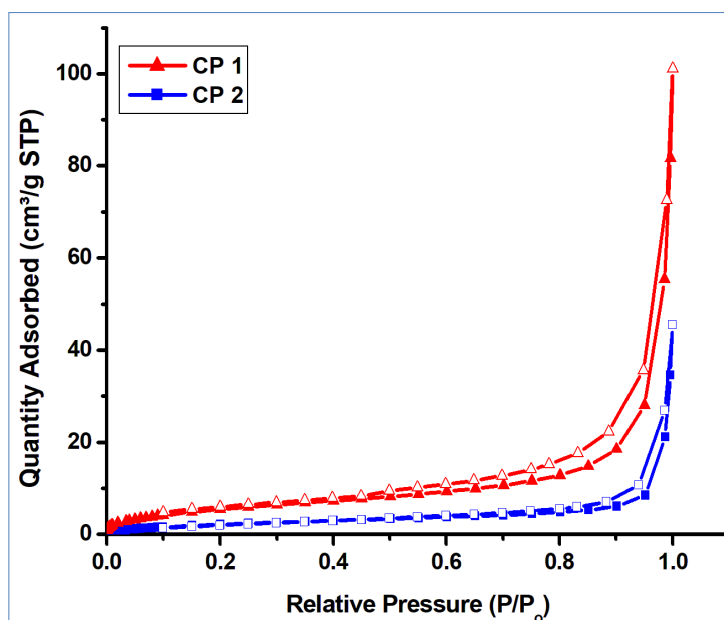

Figure S6  $N_2$  adsorption isotherms of CPs **1** and **2** after recovered from catalytic reactions [solid symbols represent the adsorption curves and the empty symbols indicate the desorption curves].

| Table S1: Crystal data and structure refinement details for compounds 1-2 |                                  |                             |
|---------------------------------------------------------------------------|----------------------------------|-----------------------------|
| Identification name                                                       | <b>1</b>                         | <b>2</b>                    |
| Formulae                                                                  | $C_{119}H_{122}Cd_4N_{13}O_{25}$ | $C_{65}H_{65}Cd_2N_7O_{13}$ |
| Mol. wt.                                                                  | 2583.89                          | 1377.04                     |
| Crystal system                                                            | Monoclinic                       | Monoclinic                  |
| Space group                                                               | $P2_1/n$                         | $P2_1/c$                    |
| Temperature /K                                                            | 150                              | 296                         |
| Wavelength /Å                                                             | 0.71073                          | 0.71073                     |
| $a$ /Å                                                                    | 10.3429(16)                      | 10.2598(8)                  |
| $b$ /Å                                                                    | 28.417(4)                        | 17.9419(15)                 |
| $c$ /Å                                                                    | 39.423(6)                        | 34.346(3)                   |
| $\alpha$ /°                                                               | 90                               | 90                          |
| $\beta$ /°                                                                | 93.408(6)                        | 94.262(3)                   |
| $\gamma$ /°                                                               | 90                               | 90                          |
| $V$ / Å <sup>3</sup>                                                      | 11566(3)                         | 6304.9(9)                   |
| Z                                                                         | 4                                | 4                           |
| Density/Mgm <sup>-3</sup>                                                 | 1.484                            | 1.451                       |

|                               |                                               |                                              |
|-------------------------------|-----------------------------------------------|----------------------------------------------|
| Abs. Coeff. /mm <sup>-1</sup> | 0.803                                         | 0.743                                        |
| F(000)                        | 5276                                          | 2816                                         |
| Refl. collected               | 255227                                        | 104782                                       |
| Refl. unique                  | 23693                                         | 13425                                        |
| Max. 2 $\theta$ /°            | 26.471                                        | 26.833                                       |
| Ranges (h, k, l)              | -12<= h <=12<br>-35 <= k <=33<br>-49<= l <=49 | -13<= h <=13<br>-22<= k <=22<br>-43<= l <=43 |
| Complete to 2 $\theta$ (%)    | 99.3                                          | 99.3                                         |
| Refl. with I > 2 $\sigma$ (I) | 20709                                         | 8473                                         |
| Data/Restraints/Parameters    | 23693/503/1492                                | 13425/6/ 797                                 |
| Goof ( $F^2$ )                | 1.087                                         | 1.053                                        |
| R1 [I > 2s(I)]                | 0.0646                                        | 0.0532                                       |
| wR2 [I > 2s(I)]               | 0.1492                                        | 0.1150                                       |
| R1 [all data]                 | 0.0746                                        | 0.1097                                       |
| wR2 [all data]                | 0.1555                                        | 0.1370                                       |

Table S2: Selected bond distances (Å) and angles (°) for compounds 1-2

|          |                                                                                                                                                                                                                                                                                                                                                                                                                                                                                                                                                                                                                                                                                                                                                                                                                                                                                                                                                                                                                                                                                                                                                                                                                                                                                                                                                                                                                                                                                                                                                                                                                                                                                                                                                                                                                                                                                                     |
|----------|-----------------------------------------------------------------------------------------------------------------------------------------------------------------------------------------------------------------------------------------------------------------------------------------------------------------------------------------------------------------------------------------------------------------------------------------------------------------------------------------------------------------------------------------------------------------------------------------------------------------------------------------------------------------------------------------------------------------------------------------------------------------------------------------------------------------------------------------------------------------------------------------------------------------------------------------------------------------------------------------------------------------------------------------------------------------------------------------------------------------------------------------------------------------------------------------------------------------------------------------------------------------------------------------------------------------------------------------------------------------------------------------------------------------------------------------------------------------------------------------------------------------------------------------------------------------------------------------------------------------------------------------------------------------------------------------------------------------------------------------------------------------------------------------------------------------------------------------------------------------------------------------------------|
| <b>1</b> | <p>Cd1-O10 2.165(4); Cd1-O2 2.201(4); Cd1-O6 2.213(4); Cd1-O4 2.276(4); Cd1-O3 2.429(4); Cd2-O1 2.247(4); Cd2-O5 2.277(5); Cd2-O9 2.211(4); Cd2-O17 2.302(6); Cd2-O18 2.285(5); Cd2-O19 2.269(7); Cd3-O12 2.207(4); Cd3-O14 2.216(4); Cd3-O8 2.283(4); Cd3-O16 2.303(3); Cd3-O15 2.371(4); Cd3-O7 2.503(4); Cd4-O7 2.329(4); Cd4-O11 2.208(4); Cd4-O13 2.208(5); Cd4-O20 2.298(7); Cd4-O21 2.275(7); Cd4-O22 2.286(7).</p> <p>&lt;O10-Cd1-O2 102.68(18); &lt;O10-Cd1-O6 136.86(17); &lt;O2-Cd1-O6 98.76(18); &lt;O10-Cd1-O4 110.92(16); &lt;O2-Cd1-O4 93.27(14); &lt;O6-Cd1-O4 104.65(17); &lt;O10-Cd1-O3 92.98(17); &lt;O2-Cd1-O3 148.63(15); &lt;O6-Cd1-O3 87.45(18); &lt;O4-Cd1-O3 55.54(13); &lt;O9-Cd2-O1 97.80(19); &lt;O9-Cd2-O19 88.4(3); &lt;O1-Cd2-O19 89.7(3); &lt;O9-Cd2-O5 94.10(17); &lt;O1-Cd2-O5 94.60(18); &lt;O19-Cd2-O5 174.7(3) ; &lt;O9-Cd2-O18 93.48(19); &lt;O1-Cd2-O18 168.2(2); &lt;O19-Cd2-O18 87.0(3); &lt;O5-Cd2-O18 88.2(2); &lt;O9-Cd2-O17 174.8(3); &lt;O1-Cd2-O17 83.4(2); &lt;O19-Cd2-O17 86.5(4); &lt;O5-Cd2-O17 90.9(3); &lt;O18-Cd2-O17 85.0(2); &lt;O12-Cd3-O14 97.89(16); &lt;O12-Cd3-O8 147.19(14); &lt;O14-Cd3-O8 91.32(14); &lt;O12-Cd3-O16 100.21(15); &lt;O14-Cd3-O16 92.85(13); &lt;O8-Cd3-O16 110.75(14); &lt;O12-Cd3-O15 96.62(16); &lt;O14-Cd3-O15 147.78(14); &lt;O8-Cd3-O15 91.86(14); &lt;O16-Cd3-O15 56.23(12); &lt;O12-Cd3-O7 92.57(14); &lt;O14-Cd3-O7 109.56(14); &lt;O8-Cd3-O7 54.78(13); &lt;O16-Cd3-O7 152.45(13); &lt;O15-Cd3-O7 98.33(13); &lt;O11-Cd4-O13 109.1(2); &lt;O11-Cd4-O21 87.4(3); &lt;O13-Cd4-O21 163.3(3); &lt;O11-Cd4-O22 167.7(3); &lt;O13-Cd4-O22 81.6(3); &lt;O21-Cd4-O22 81.7(4); &lt;O11-Cd4-O20 87.1(2); &lt;O13-Cd4-O20 84.8(3); &lt;O21-Cd4-O20 93.6(4); &lt;O22-Cd4-O20 88.0(3); &lt;O11-Cd4-O7 91.12(15); &lt;O13-Cd4-O7 84.81(17); &lt;O21-Cd4-O7 97.9(3); &lt;O22-Cd4-O7 95.9(3); &lt;O20-Cd4-O7 168.3(3).</p> |
| <b>2</b> | <p>Cd1-O5 2.200(3); Cd1-O2 2.255(4); Cd1-O4 2.254(3); Cd1-O7 2.313(3); Cd1-O8 2.470(3); Cd1-O1 2.481(4); Cd2-O6 2.222(4); Cd2-O3 2.230(4); Cd2-O9 2.272(4); Cd2-O10 2.275(4); Cd2-O8 2.277(3); Cd2-O11 2.298(4).</p>                                                                                                                                                                                                                                                                                                                                                                                                                                                                                                                                                                                                                                                                                                                                                                                                                                                                                                                                                                                                                                                                                                                                                                                                                                                                                                                                                                                                                                                                                                                                                                                                                                                                                |

|                                                                                                                                                                                                                                                                                                                                                                                                                                                                                                                                                                                                                                                                                                                                                                                                            |
|------------------------------------------------------------------------------------------------------------------------------------------------------------------------------------------------------------------------------------------------------------------------------------------------------------------------------------------------------------------------------------------------------------------------------------------------------------------------------------------------------------------------------------------------------------------------------------------------------------------------------------------------------------------------------------------------------------------------------------------------------------------------------------------------------------|
| <p>&lt;O5-Cd1-O2 101.58(15); &lt;O5-Cd1-O4 91.57(15); &lt;O2-Cd1-O4 89.30(13); &lt;O5-Cd1-O7 147.41(13); &lt;O2-Cd1-O7 103.95(14); &lt;O4-Cd1-O7 108.57(15); &lt;O5-Cd1-O8 93.48(12); &lt;O2-Cd1-O8 148.21(13); &lt;O4-Cd1-O8 118.37(12); &lt;O7-Cd1-O8 54.60(12); &lt;O5-Cd1-O1 90.38(15); &lt;O2-Cd1-O1 54.58(13); &lt;O4-Cd1-O1 143.39(13); &lt;O7-Cd1-O1 88.17(15); &lt;O8-Cd1-O1 97.98(12); &lt;O6-Cd2-O3 102.07(16); &lt;O6-Cd2-O9 172.20(16); &lt;O3-Cd2-O9 85.02(17); &lt;O6-Cd2-O10 87.60(16); &lt;O3-Cd2-O10 168.21(16); &lt;O9-Cd2-O10 84.99(18); &lt;O6-Cd2-O8 88.01(14); &lt;O3-Cd2-O8 85.40(14); &lt;O9-Cd2-O8 95.87(15); &lt;O10-Cd2-O8 101.85(15); &lt;O6-Cd2-O11 87.03(18); &lt;O3-Cd2-O11 88.30(17); &lt;O9-Cd2-O11 89.97(18); &lt;O10-Cd2-O11 85.45(18); &lt;O8-Cd2-O11 171.00(16).</p> |
|------------------------------------------------------------------------------------------------------------------------------------------------------------------------------------------------------------------------------------------------------------------------------------------------------------------------------------------------------------------------------------------------------------------------------------------------------------------------------------------------------------------------------------------------------------------------------------------------------------------------------------------------------------------------------------------------------------------------------------------------------------------------------------------------------------|

| Compound        | D-H...A          | D...H (Å) | H...A (Å) | D...A (Å) | <D-H...A(°) |
|-----------------|------------------|-----------|-----------|-----------|-------------|
| <b>1</b>        | N1-H1N...O25     | 0.88      | 1.97      | 2.848(8)  | 172         |
|                 | N3-H3N...O24     | 0.88      | 2.18      | 2.976(8)  | 150         |
|                 | C54-H54...O24    | 0.95      | 2.51      | 3.299(8)  | 141         |
|                 | C106-H10F...N11  | 0.98      | 2.68      | 3.650(2)  | 171         |
|                 | C106-H10H...O15  | 0.98      | 2.60      | 3.349(13) | 134         |
|                 | C105-H105...O20  | 0.95      | 2.60      | 3.330(2)  | 134         |
|                 | C104-H10M...O23  | 0.98      | 2.46      | 3.340(3)  | 150         |
|                 | C103-H10P...O15  | 0.98      | 2.41      | 3.327(15) | 156         |
|                 | C113-H11F...O5   | 0.98      | 2.26      | 3.220(2)  | 169         |
|                 | C126-H12E...N11A | 0.98      | 1.59      | 2.310(6)  | 126         |
| C126-H12F...N10 | 0.98             | 2.91      | 3.730(8)  | 142       |             |
| <b>2</b>        | N1-H1N...O13     | 0.80      | 2.20      | 2.921(8)  | 161         |
|                 | N2-H2N...O12     | 0.86      | 2.53      | 3.327(8)  | 154         |
|                 | C33-H33...O12    | 0.93      | 2.56      | 3.400(7)  | 151         |
|                 | C54-H54...O6     | 0.93      | 2.37      | 3.054(8)  | 130         |
|                 | C61-H61A...O4    | 0.96      | 2.42      | 3.356(9)  | 165         |
|                 | C51-H51...O11    | 0.93      | 2.58      | 3.181(10) | 123         |
|                 | C64-H64A...O4    | 0.96      | 2.54      | 3.303(10) | 137         |
|                 | C64-H64B...O2    | 0.96      | 2.52      | 3.371(10) | 148         |
